# Supplementary material for: The bone is the major source of high circulating intact fibroblast growth factor-23 in acute murine polymicrobial sepsis induced by cecum ligation puncture
Source: PubMed Central journal article supplement (PMC8121358; doi:10.1371/journal.pone.0251317), 2021-05-14
Supplement: pone.0251317.s001.pdf [file pone.0251317.s001.pdf]

## Females

### Western Blot of renal total membrane fractions - Membrane 1

#### A) NaPi2a staining

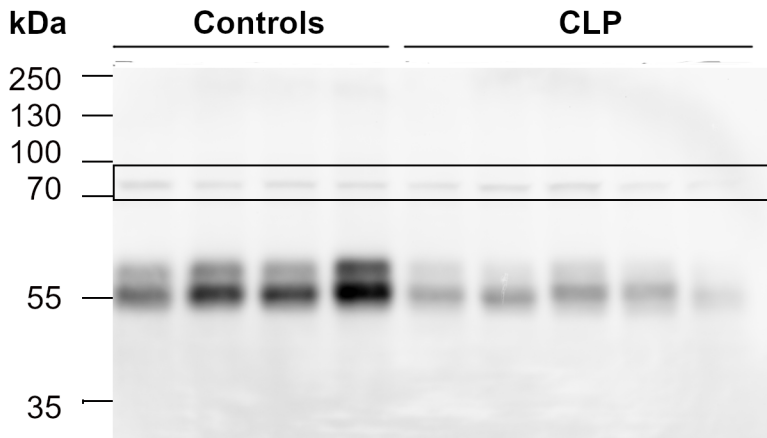

#### B) $\beta$ -actin staining

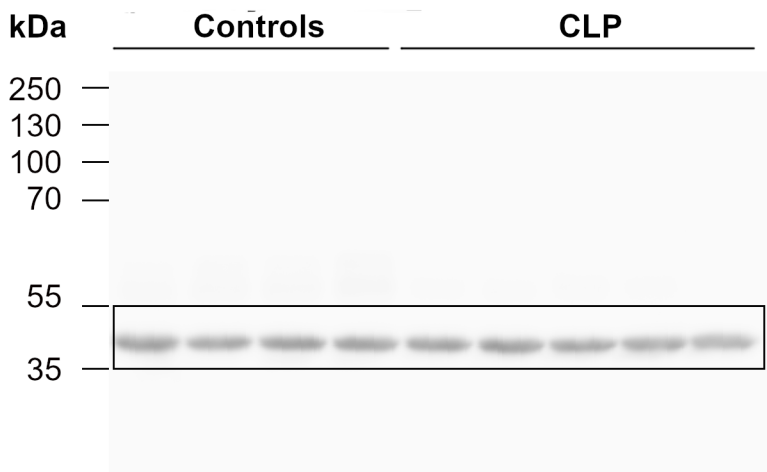

Images were captured using the Chemi Doc-It 600 Image System (UVP/Analytik Jena AG, Jena, Germany). Intensity of the protein bands was quantified by using Image Quant 5.0 software (Molecular Dynamics). Boxes indicated representative picture panels for Fig 5 in the manuscript.

## Females

### Western Blot of renal total membrane fractions - Membrane 2

#### A) NaPi2a staining

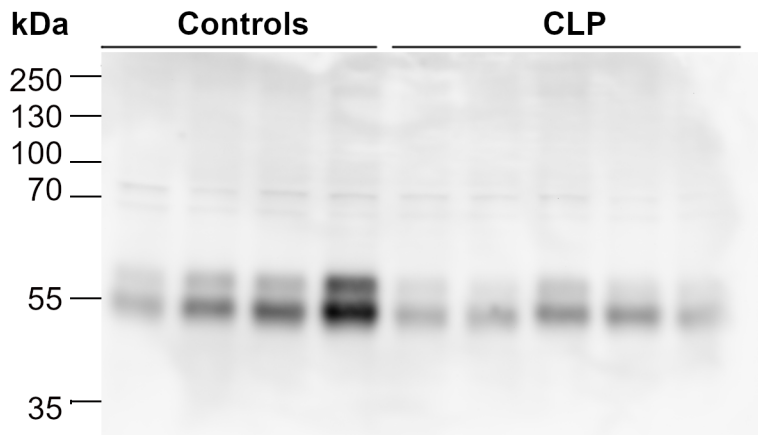

#### B) $\beta$ -actin staining

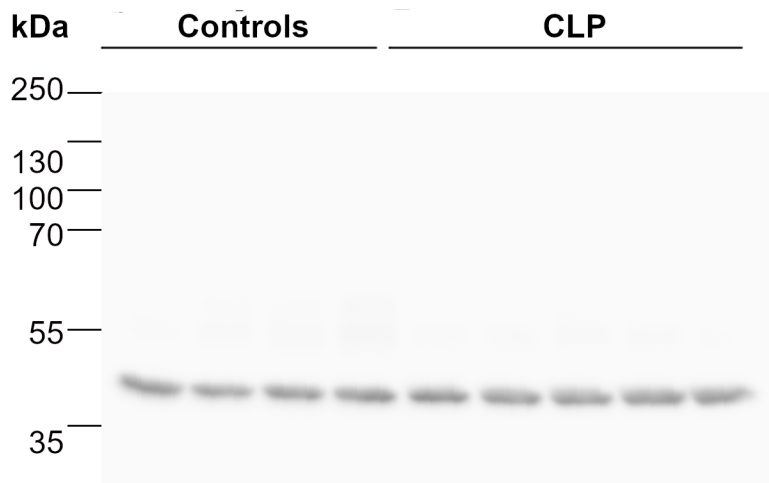

Images were captured using the Chemi Doc-It 600 Image System (UVP/Analytik Jena AG, Jena, Germany). Intensity of the protein bands was quantified by using Image Quant 5.0 software (Molecular Dynamics).

## Females

### Western Blot of renal total membrane fractions - Membrane 3

#### A) NCC staining

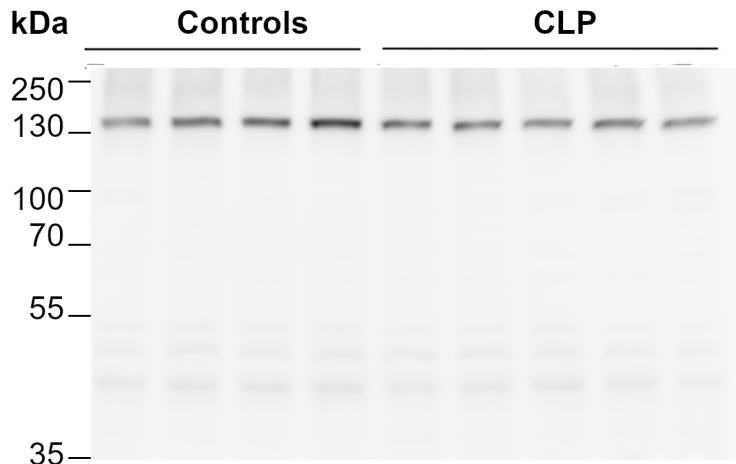

#### B) TRPV5 staining

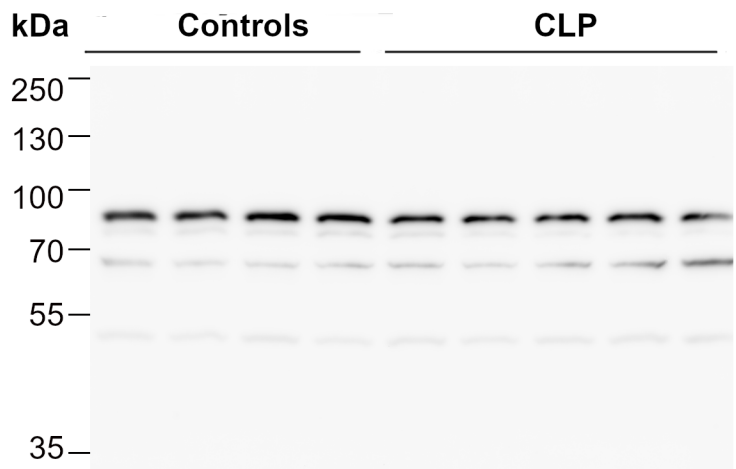

Images were captured using the Chemi Doc-It 600 Image System (UVP/Analytik Jena AG, Jena, Germany). Intensity of the protein bands was quantified by using Image Quant 5.0 software (Molecular Dynamics).

## Females

### Western Blot of renal total membrane fractions - Membrane 3

#### A) Klotho staining

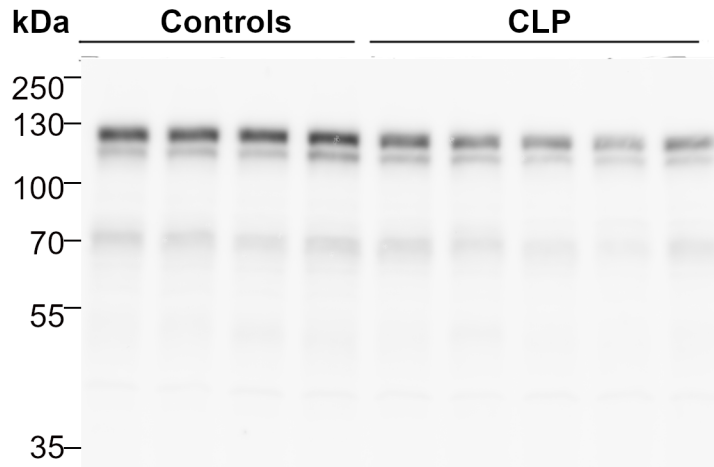

#### B) $\beta$ -actin staining

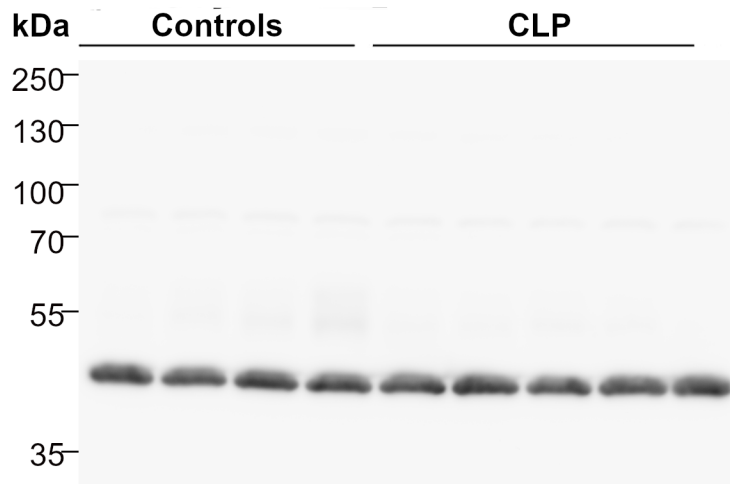

Images were captured using the Chemi Doc-It 600 Image System (UVP/Analytik Jena AG, Jena, Germany). Intensity of the protein bands was quantified by using Image Quant 5.0 software (Molecular Dynamics).

## Females

### Western Blot of renal total membrane fractions - Membrane 4

#### A) NCC staining

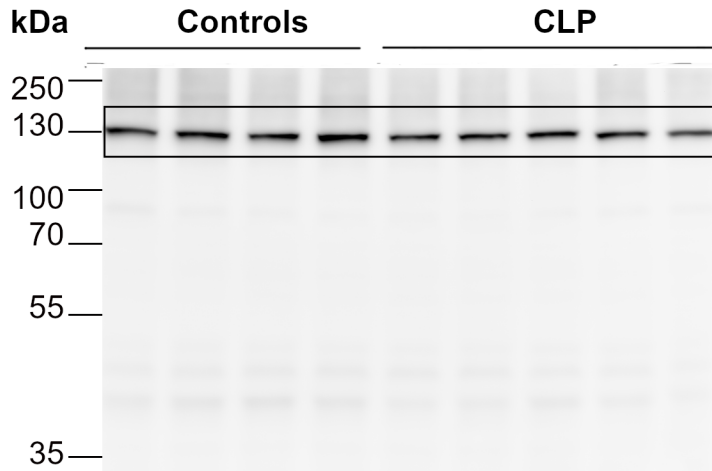

#### B) TRPV5 staining

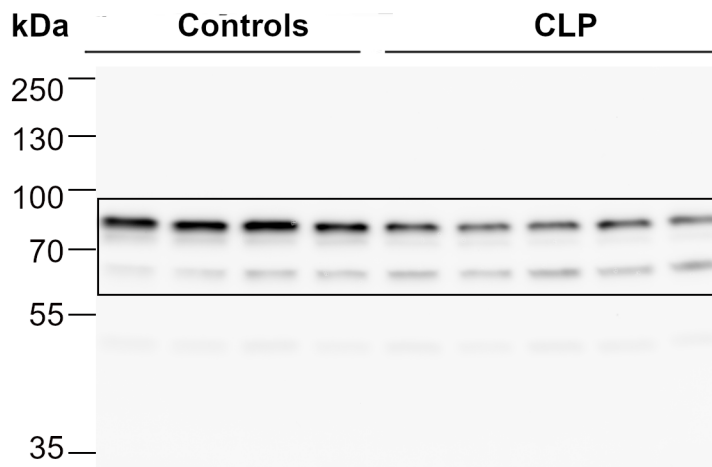

Images were captured using the Chemi Doc-It 600 Image System (UVP/Analytik Jena AG, Jena, Germany). Intensity of the protein bands was quantified by using Image Quant 5.0 software (Molecular Dynamics). Boxes indicated representative picture panels for Fig 5 in the manuscript.

## Females

### Western Blot of renal total membrane fractions - Membrane 4

#### A) Klotho staining

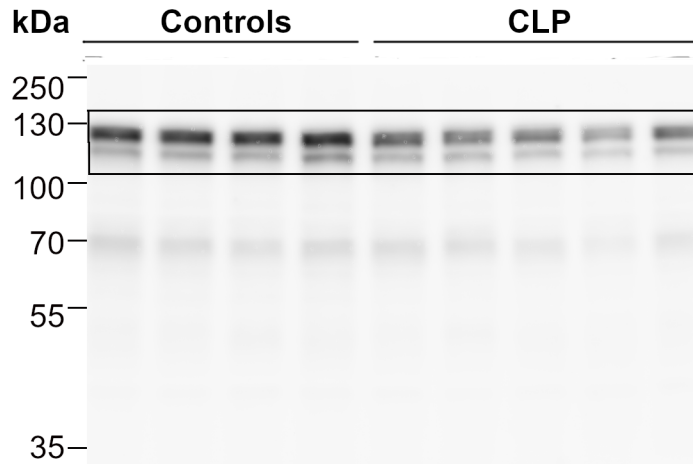

#### B) $\beta$ -actin staining

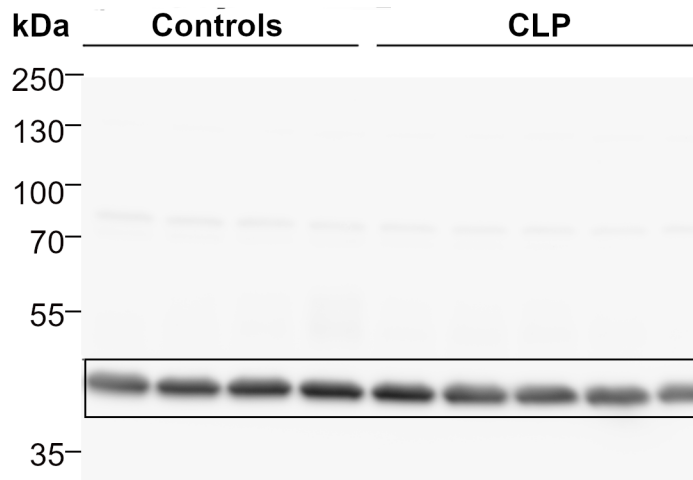

Images were captured using the Chemi Doc-It 600 Image System (UVP/Analytik Jena AG, Jena, Germany). Intensity of the protein bands was quantified by using Image Quant 5.0 software (Molecular Dynamics). Boxes indicated representative picture panels for Fig 5 in the manuscript.

## Males

### Western Blot of renal total membrane fractions - Membrane 1

#### A) NaPi2a staining

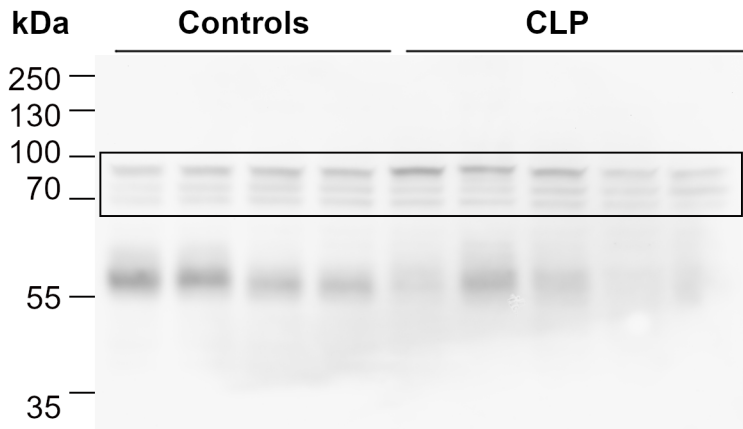

#### B) $\beta$ -actin staining

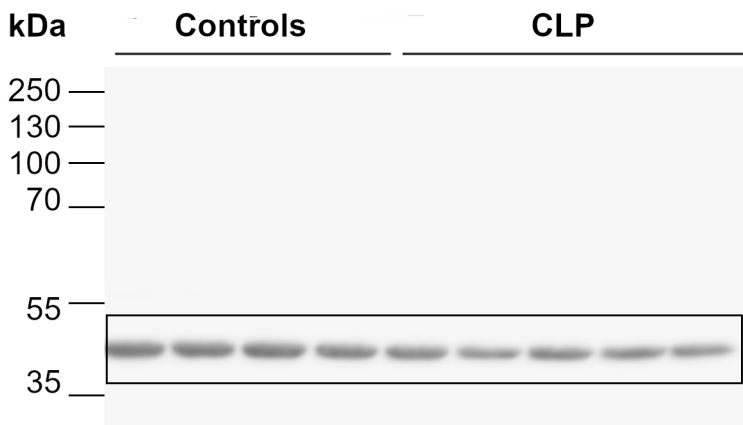

Images were captured using the Chemi Doc-It 600 Image System (UVP/Analytik Jena AG, Jena, Germany). Intensity of the protein bands was quantified by using Image Quant 5.0 software (Molecular Dynamics). Boxes indicated representative picture panels for Fig 5 in the manuscript.

## Males

### Western Blot of renal total membrane fraction - Membrane 2

#### A) NaPi2a staining

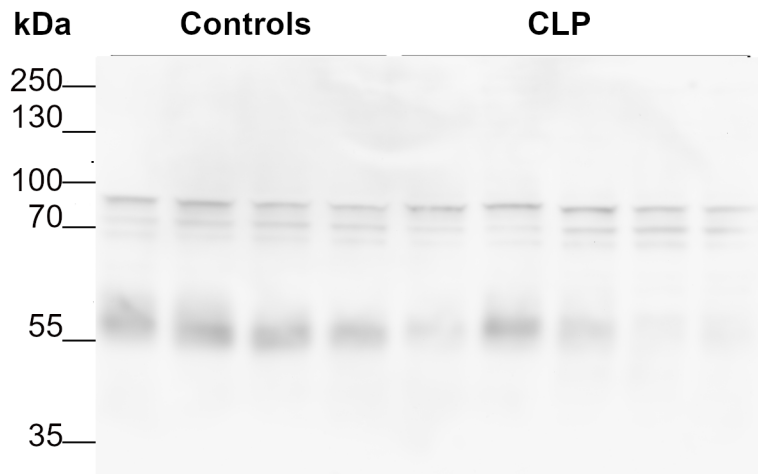

#### B) $\beta$ -actin staining

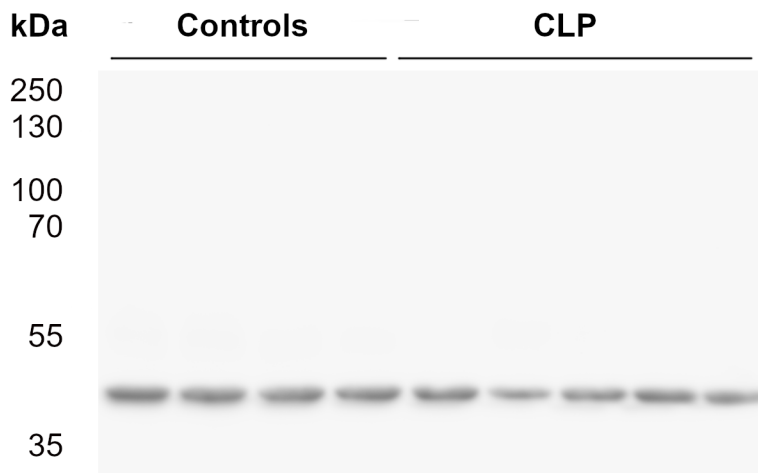

Images were captured using the Chemi Doc-It 600 Image System (UVP/Analytik Jena AG, Jena, Germany). Intensity of the protein bands was quantified by using Image Quant 5.0 software (Molecular Dynamics).



## Males

### Western Blot of renal total membrane fractions - Membrane 3

#### A) NCC staining

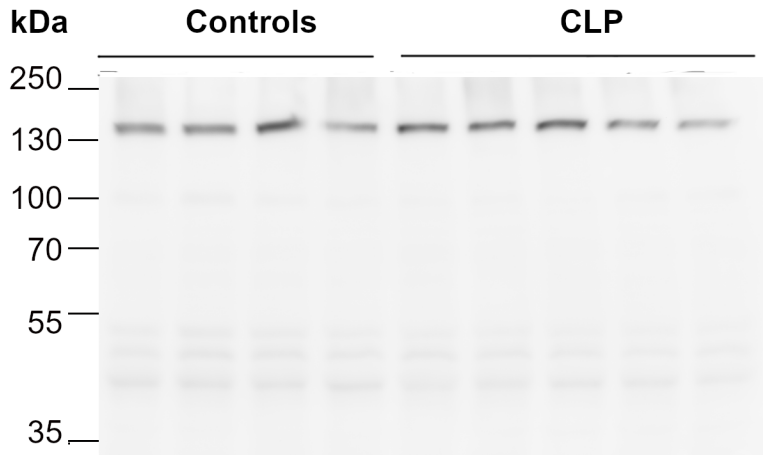

#### B) TRPV5 staining

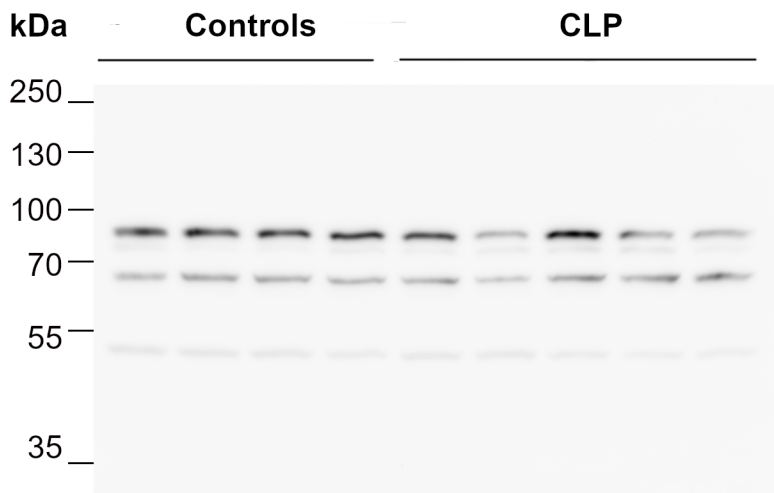

Images were captured using the Chemi Doc-It 600 Image System (UVP/Analytik Jena AG, Jena, Germany). Intensity of the protein bands was quantified by using Image Quant 5.0 software (Molecular Dynamics).

## Males

### Western Blot of renal total membrane fractions - Membrane 3

#### A) Klotho staining

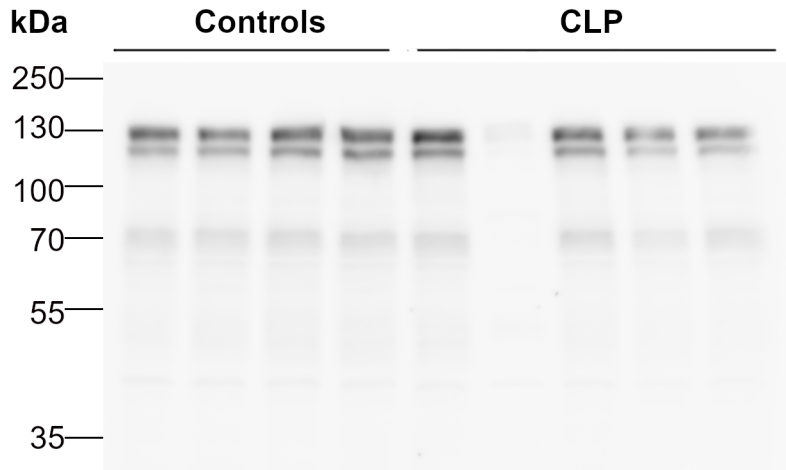

#### B) $\beta$ -actin staining

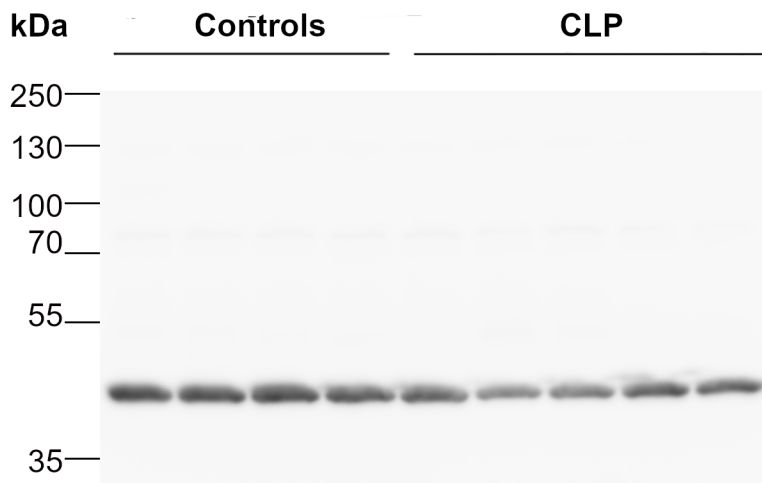

Images were captured using the Chemi Doc-It 600 Image System (UVP/Analytik Jena AG, Jena, Germany). Intensity of the protein bands was quantified by using Image Quant 5.0 software (Molecular Dynamics).

## Males

### Western Blot of renal total membrane fractions - Membrane 4

#### A) NCC staining

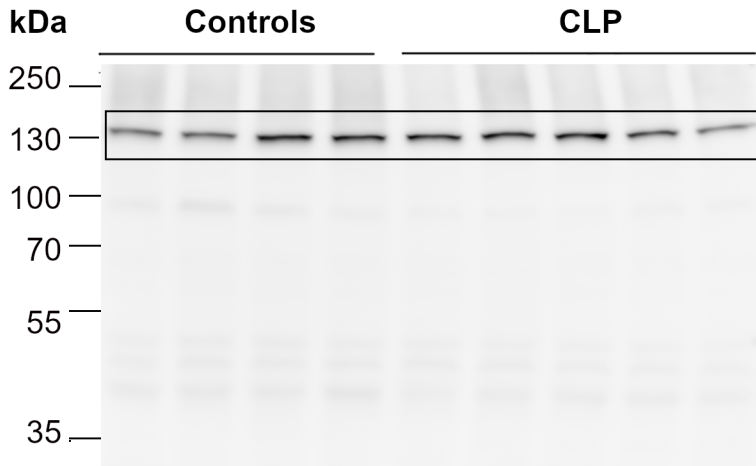

#### B) TRPV5 staining

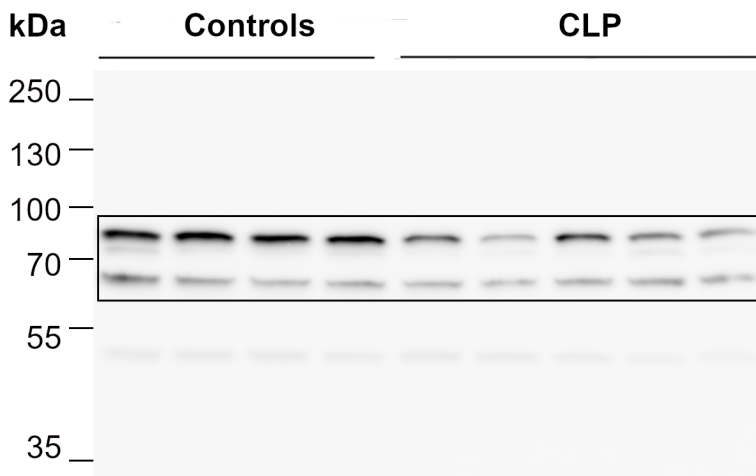

Images were captured using the Chemi Doc-It 600 Image System (UVP/Analytik Jena AG, Jena, Germany). Intensity of the protein bands was quantified by using Image Quant 5.0 software (Molecular Dynamics). Boxes indicated representative picture panels for Fig 5 in the manuscript.

## Males

### Western Blot of renal total membrane fractions - Membrane 4

#### A) Klotho staining

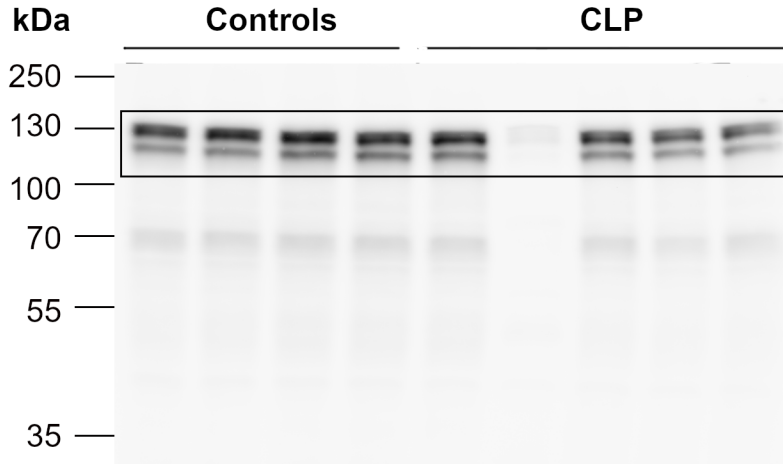

#### B) $\beta$ -actin staining

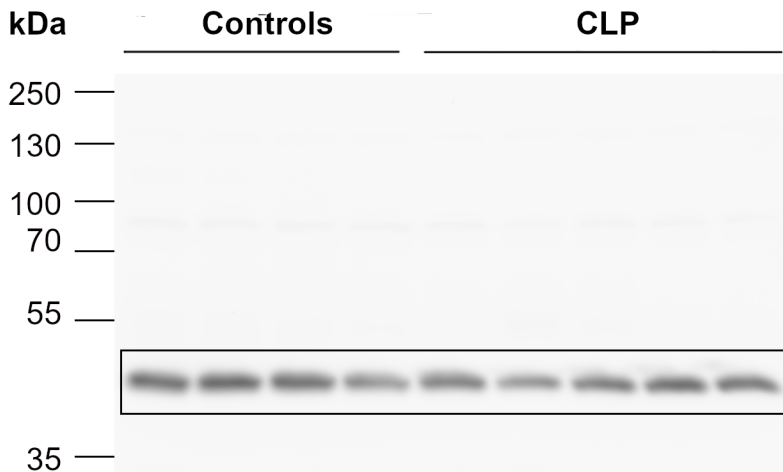

Images were captured using the Chemi Doc-It 600 Image System (UVP/Analytik Jena AG, Jena, Germany). Intensity of the protein bands was quantified by using Image Quant 5.0 software (Molecular Dynamics). Boxes indicated representative picture panels for Fig 5 in the manuscript.
